# Supplementary material for: Prevalence and Prognostic Value of Myocardial Injury in the Initial Presentation of SARS-CoV-2 Infection among Older Adults
Source: MDPI journal article supplement (doi:10.3390/jcm10163738), 2021-08-23
Supplement: s1 [file s1]

**Table S1.** Baseline characteristics. And comparison between individuals with and without myocardial injury

|                                             | <i>Overall</i> |          | <i>Myocardial Injury</i> |         | <i>Without Myocardial Injury</i> |         | <i>p-value</i>   |
|---------------------------------------------|----------------|----------|--------------------------|---------|----------------------------------|---------|------------------|
| <b>Cohort Characteristics</b>               | n=313          |          | n=224                    |         | n=89                             |         |                  |
| Median age, years (IQR)                     | 79             | (73-87)* | 83                       | (75-88) | 74                               | (68-78) | <b>&lt;0.001</b> |
| Male sex (%)                                | 134            | (44%)    | 105                      | (48%)   | 29                               | (33%)   | <b>0.022</b>     |
| Long Term Care Facility (%)                 | 59             | (19%)    | 47                       | (21%)   | 12                               | (13%)   | 0.231            |
| Partially Dependent for life activities (%) | 62             | (21%)    | 52                       | (24%)   | 10                               | (11%)   | <b>0.024</b>     |
| Totally Dependent for life activities (%)   | 42             | (14%)    | 39                       | (18%)   | 3                                | (3%)    | <b>0.002</b>     |
| <b>Comorbidities</b>                        |                |          |                          |         |                                  |         |                  |
| Current smoker (%)                          | 11             | (3.5%)   | 9                        | (4%)    | 2                                | (2.2%)  | 0.442            |
| Hypertension (%)                            | 230            | (74%)    | 175                      | (78%)   | 55                               | (62%)   | 0.033            |
| Diabetes Mellitus (%)                       | 87             | (28%)    | 75                       | (33%)   | 12                               | (13%)   | <b>&lt;0.001</b> |
| Chronic lung disease (%)                    | 31             | (10%)    | 25                       | (11%)   | 6                                | (7%)    | 0.238            |
| Chronic heart disease (%)                   | 78             | (25%)    | 71                       | (32%)   | 7                                | (8%)    | <b>&lt;0.001</b> |
| Chronic renal disease (%)                   | 88             | (28%)    | 66                       | (29%)   | 22                               | (24%)   | 0.400            |
| Chronic liver disease (%)                   | 17             | (%)      | 13                       | (6%)    | 4                                | (4.5%)  | 0.645            |
| Dementia (%)                                | 54             | (17%)    | 45                       | (20%)   | 9                                | (3%)    | <b>0.035</b>     |
| Autoimmunitary Disease (%)                  | 14             | (4%)     | 9                        | (4%)    | 5                                | (5.5%)  | 0.537            |
| HIV-infection (%)                           | 1              | (0.3%)   | 1                        | (0.5%)  | 0                                | (0%)    | 0.669            |
| Obesity (%)                                 | 57             | (18%)    | 40                       | (18%)   | 17                               | (19%)   | 0.797            |
| Active cancer (%)                           | 13             | (4%)     | 12                       | (5%)    | 1                                | (1%)    | 0.090            |
| ARB-2 (%)                                   | 57             | (18%)    | 47                       | (21%)   | 10                               | (11%)   | <b>0.050</b>     |
| ACE inhibitors (%)                          | 98             | (31%)    | 70                       | (31%)   | 28                               | (31%)   | 0.971            |
| Estatins (%)                                | 116            | (37%)    | 83                       | (37%)   | 33                               | (37%)   | 0.997            |

|                                             |       |             |      |             |      |             |                  |
|---------------------------------------------|-------|-------------|------|-------------|------|-------------|------------------|
| Charlson Comorbidity Index,<br>median (IQR) |       |             |      |             |      |             |                  |
| No comorbidity, n (%)                       | 81    | (25%)       | 41   | (21%)       | 40   | (45%)       | <b>&lt;0.001</b> |
| Medium-low (1-2), n (%)                     | 104   | (33%)       | 76   | (34%)       | 28   | (31%)       | 0.416            |
| High ( $\geq 3$ ), n (%)                    | 128   | (42%)       | 107  | (45%)       | 21   | (24%)       | <b>&lt;0.001</b> |
| <b>Onset symptoms</b>                       |       |             |      |             |      |             |                  |
| Dyspnoea (%)                                | 158   | (50%)       | 119  | (53%)       | 39   | (44%)       | 0.137            |
| Fever (%)                                   | 222   | (71%)       | 146  | (65%)       | 76   | (85%)       | <b>&lt;0.001</b> |
| Cough (%)                                   | 203   | (65%)       | 131  | (58%)       | 72   | (81%)       | <b>&lt;0.001</b> |
| Diarrhoea (%)                               | 74    | (24%)       | 48   | (21%)       | 26   | (29%)       | 0.144            |
| Headache (%)                                | 22    | (7%)        | 13   | (6%)        | 9    | (10%)       | 0.179            |
| Anosmia (%)                                 | 16    | (5%)        | 7    | (3%)        | 9    | (10%)       | 0.011            |
| Consciousness impairment (%)                | 58    | (18%)       | 52   | (23%)       | 6    | (7%)        | <b>0.001</b>     |
| Confirmed Pulmonary Embolism (%)            | 15    | (5%)        | 9    | (4%)        | 6    | (7%)        | 0.309            |
| Acute Abnormalities in the EKG (%)          | 13    | (4%)        | 12   | (5%)        | 1    | (1%)        | 0.090            |
| <b>Clinical markers at onset</b>            |       |             |      |             |      |             |                  |
| Median C-Reactive Protein mg/dl (IQR)       | 7.3   | (3.3-15.4)  | 8.68 | (3.8-18.6)  | 5.3  | (2.3-11.2)  | <b>0.02</b>      |
| Procalcitonin mg/dl (IQR)                   | 0.152 | (0.09-0.36) | 0.21 | (0.10-0.54) | 0.10 | (0.07-0.17) | <b>0.02</b>      |
| Median lymphocyte count /ml (IQR)           | 0.955 | (0.65-1.4)  | 0.88 | (0.62-1.29) | 1.07 | (0.82-1.63) | <b>0.001</b>     |
| Median IL-6 pg/ml (IQR)                     | 49    | (19-103)    | 45   | (12-131)    | 57   | (25-85)     | 0.112            |
| Median Lactate Dehydrogenase UI/l (IQR)     | 285   | (232-386)   | 288  | (232-411)   | 271  | (236-344)   | <b>0.038</b>     |
| Median D-Dimer UI/l (IQR)                   | 1000  | (620-2200)  | 1215 | (680-2540)  | 780  | (450-1330)  | <b>&lt;0.001</b> |
| Median Pro-BNP UI/l (IQR)                   | 487   | (222-1391)  | 861  | (344-3316)  | 235  | (101-349)   | <b>0.001</b>     |
| Median Troponin UI/l (IQR)                  |       |             |      |             |      |             |                  |
| Median Creatinin mg/dl(IQR)                 | 0.99  | (0.77-1.26) | 1.08 | (0.85-1.47) | 0.79 | (0.67-0.95) | <b>&lt;0.001</b> |
| Median PaFi (IQR)                           | 180   | (95-289)    | 166  | (91-281)    | 219  | (101-310)   | 0.213            |

|                                             |     |           |     |           |     |           |                  |
|---------------------------------------------|-----|-----------|-----|-----------|-----|-----------|------------------|
| Median MEWS (IQR)                           | 2   | (1-3)     | 2   | (2-3)     | 2   | (1-2)     | <b>0.004</b>     |
| Median Cholesterol mg/ml (IQR)              | 134 | (118-161) | 142 | (119-162) | 131 | (113-143) | 0.072            |
| <b>Treatment</b>                            |     |           |     |           |     |           |                  |
| Hydroxychloroquine (%)                      | 266 | (89.5%)   | 183 | (86%)     | 83  | (95%)     | <b>0.028</b>     |
| Azythromicin (%)                            | 269 | (90%)     | 185 | (87%)     | 84  | (96%)     | <b>0.019</b>     |
| Tocilizumab (%)                             | 35  | (12%)     | 18  | (8.5%)    | 17  | (19%)     | <b>0.008</b>     |
| Dexamethasone (%)                           | 61  | (19%)     | 47  | (21%)     | 14  | (15%)     | 0.432            |
| Methylprednisolone (%)                      | 69  | (22%)     | 52  | (23%)     | 17  | (19%)     | 0.428            |
| <b>Clinical Outcomes</b>                    |     |           |     |           |     |           |                  |
| Median Time to clinical recovery days (IQR) | 12  | (6-20)    | 13  | (6-21)    | 9   | (5-17)    | <b>0.036</b>     |
| ICU admission (%)                           | 46  | (15%)     | 29  | (14%)     | 17  | (19%)     | 0.230            |
| Death (%)                                   | 82  | (26%)     | 71  | (31%)     | 11  | (12%)     | <b>&lt;0.001</b> |

**Table S2.**Comparison between younger adults ant older adults with Myocardial Injury

|                                             | <i>Younger adults (n=321)</i> |           | <i>Older Adults (n=313)</i> |          | <i>p-value</i>   |
|---------------------------------------------|-------------------------------|-----------|-----------------------------|----------|------------------|
| Myocardial Injury                           | N=141 (43%)                   |           | N=224 (71%)                 |          | <0.001           |
| Median age, years (IQR)                     | 51                            | (42-58)   | 83                          | (75-88)  | <b>&lt;0.001</b> |
| Male sex (%)                                | 60                            | (43%)     | 105                         | (47%)    | 0.432            |
| Barthel index at admission, median (IQR)    | 100                           | (100-100) | 95                          | (51-100) | <b>&lt;0.001</b> |
| Long Term Care Facility (%)                 | 2                             | (1%)      | 47                          | (20%)    | <b>&lt;0.001</b> |
| Partially Dependent for life activities (%) | 6                             | (4%)      | 10                          | (23%)    | <b>&lt;0.001</b> |
| Totally Dependent for life activities (%)   | 3                             | (2%)      | 39                          | (17%)    | <b>&lt;0.001</b> |

| <b>Comorbidities</b>                     |     |        |     |        |                  |
|------------------------------------------|-----|--------|-----|--------|------------------|
| Current smoker (%)                       | 19  | (14%)  | 9   | (4%)   | <b>0.001</b>     |
| Hypertension (%)                         | 30  | (21%)  | 175 | (78%)  | <b>&lt;0.001</b> |
| Diabetes Mellitus (%)                    | 12  | (8%)   | 75  | (33%)  | <b>&lt;0.001</b> |
| Chronic lung disease (%)                 | 6   | (4%)   | 25  | (11%)  | <b>0.021</b>     |
| Chronic heart disease (%)                | 7   | (4.5%) | 71  | (31%)  | <b>&lt;0.001</b> |
| Chronic renal disease (%)                | 99  | (70%)  | 66  | (29%)  | <b>&lt;0.001</b> |
| Chronic liver disease (%)                | 5   | (3%)   | 13  | (6%)   | 0.335            |
| Dementia (%)                             | 2   | (1.5%) | 45  | (20%)  | <b>&lt;0.001</b> |
| Autoimmunitary Disease (%)               | 4   | (3%)   | 9   | (4%)   | 0.553            |
| HIV-infection (%)                        | 4   | (3%)   | 1   | (0.5%) | <b>0.002</b>     |
| Obesity (%)                              | 19  | (13%)  | 40  | (18%)  | 0.268            |
| Active cancer (%)                        | 1   | (1%)   | 12  | (8%)   | 0.090            |
| ARB-2 (%)                                | 7   | (5%)   | 47  | (21%)  | <b>&lt;0.001</b> |
| ACE inhibitors (%)                       | 13  | (9%)   | 70  | (31%)  | <b>&lt;0.001</b> |
| Estatins (%)                             | 13  | (9%)   | 83  | (37%)  | <b>&lt;0.001</b> |
| Charlson Comorbidity Index, median (IQR) | 0   | (0-1)  | 2   | (1-4)  | <b>&lt;0.001</b> |
| No comorbidity, n (%)                    | 108 | (74%)  | 41  | (18%)  | <b>&lt;0.001</b> |
| Medium-low (1-2), n (%)                  | 18  | (11%)  | 79  | (35%)  | <b>&lt;0.001</b> |
| High ( $\geq 3$ ), n (%)                 | 21  | (15%)  | 104 | (47%)  | <b>&lt;0.001</b> |
| <b>Onset symptoms</b>                    |     |        |     |        |                  |
| Dyspnoea (%)                             | 49  | (34%)  | 119 | (53%)  | <b>&lt;0.001</b> |
| Fever (%)                                | 87  | (61%)  | 146 | (65%)  | 0.532            |
| Cough (%)                                | 89  | (63%)  | 131 | (58%)  | 0.378            |
| Diarrhoea (%)                            | 29  | (20%)  | 48  | (21%)  | 0.844            |
| Headache (%)                             | 28  | (20%)  | 13  | (6%)   | <b>&lt;0.001</b> |
| Anosmia (%)                              | 43  | (30%)  | 7   | (3%)   | <b>0.011</b>     |
| Consciousness impairment (%)             | 5   | (3%)   | 52  | (23%)  | <b>&lt;0.001</b> |
| Confirmed Pulmonary Embolism (%)         | 4   | (3%)   | 9   | (4%)   | 0.553            |
| Acute Abnormalities in the EKG (%)       | 2   | (1.5%) | 12  | (5%)   | 0.090            |

|                                              |      |             |      |             |                  |
|----------------------------------------------|------|-------------|------|-------------|------------------|
| <b>Clinical markers at onset</b>             |      |             |      |             |                  |
| Median C-Reactive Protein mg/dl (IQR)        | 6.2  | (3.8-18.6)  | 8.68 | (3.8-18.6)  | <b>0.02</b>      |
| Procalcitonin mg/dl (IQR)                    | 0.22 | (0.12-0.56) | 0.21 | (0.10-0.54) | 0.274            |
| Median lymphocyte count /ml (IQRs)           | 1.21 | (0.82-1.53) | 0.88 | (0.62-1.29) | 0.434            |
| Median IL-6 pg/ml (IQR)                      | 58   | (20-115)    | 45   | (12-131)    | 0.502            |
| Median Lactate Dehydrogenase UI/l (IQR)      | 274  | (212-430)   | 288  | (232-411)   | 0.721            |
| Median D-Dimer UI/l (IQR)                    | 800  | (430-1470)  | 1215 | (680-2540)  | 0.276            |
| Median Pro-BNP UI/l (IQRs)                   | 162  | (134-528)   | 861  | (344-3316)  | <b>0.007</b>     |
| Median Troponin UI/l (IQR)                   | 24   | (18-41)     | 30   | (20-54)     | 0.122            |
| Median Creatinin mg/dl(IQR)                  | 0.91 | (0.75-1.27) | 1.08 | (0.85-1.47) | 0.415            |
| Median PaFi (IQR)                            | 188  | (106-310)   | 166  | (91-281)    | 0.299            |
| Median MEWS (IQR)                            | 2    | (1-3)       | 2    | (2-3)       | 0.316            |
| Median Cholesterol mg/ml (IQR)               | 145  | (108-168)   | 142  | (119-162)   | 0.810            |
| <b>Treatment</b>                             |      |             |      |             |                  |
| Hydroxychloroquine (%)                       | 72   | (53%)       | 183  | (86%)       | <b>&lt;0.001</b> |
| Azythromicin (%)                             | 75   | (55%)       | 185  | (87%)       | <b>0.019</b>     |
| Tocilizumab (%)                              | 16   | (12%)       | 18   | (8.5%)      | 0.318            |
| Dexamethasone (%)                            | 13   | (9%)        | 47   | (21%)       | <b>0.003</b>     |
| Methylprednisolone (%)                       | 15   | (12%)       | 52   | (23%)       | <b>0.002</b>     |
| <b>Clinical Outcomes</b>                     |      |             |      |             |                  |
| Median Time to clinical stability days (IQR) | 11   | (6-26)      | 13   | (7-21)      | 0.936            |
| ICU admission (%)                            | 23   | (17%)       | 29   | (14%)       | 0.397            |
| Mechanical Ventilation                       | 21   | (15%)       | 45   | (20%)       | 0.223            |
| Death (%)                                    | 4    | (3%)        | 71   | (31%)       | <b>&lt;0.001</b> |
